# Supplementary material for: Multi-System Langerhans Cell Histiocytosis as a Mimic of IgG4-Related Disease: A Case Report and Literature Review
Source: PubMed Central journal article supplement (PMC9353717; doi:10.3389/fendo.2022.896227), 2022-07-22
Supplement: DataSheet_1.pdf [file DataSheet_1.pdf]

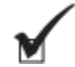

| Topic                               | Item | Checklist item description                                                                                       | Reported on Line                                                    |
|-------------------------------------|------|------------------------------------------------------------------------------------------------------------------|---------------------------------------------------------------------|
| <b>Title</b>                        | 1    | The diagnosis or intervention of primary focus followed by the words "case report" . . . . .                     | page1, line1                                                        |
| <b>Key Words</b>                    | 2    | 2 to 5 key words that identify diagnoses or interventions in this case report, including "case report" . . . . . | page1, line25-26                                                    |
| <b>Abstract<br/>(no references)</b> | 3a   | Introduction:What is unique about this case and what does it add to the scientific literature? . . . . .         | page1, line10-11                                                    |
|                                     | 3b   | Main symptoms and/or important clinical findings . . . . .                                                       | page1, line12-14                                                    |
|                                     | 3c   | The main diagnoses,therapeutic interventions,and outcomes . . . . .                                              | page1, line14-19                                                    |
|                                     | 3d   | Conclusion—What is the main "take-away" lesson(s)from this case? . . . . .                                       | page1, line21-24                                                    |
| <b>Introduction</b>                 | 4    | One or two paragraphs summarizing why this case is unique ( <b>may include references</b> ) . . . . .            | page1, line28-41                                                    |
| <b>Patient Information</b>          | 5a   | De-identified patient specific information. . . . .                                                              | page2, line2                                                        |
|                                     | 5b   | Primary concerns and symptoms of the patient. . . . .                                                            | page2, line3-5                                                      |
|                                     | 5c   | Medical, family, and psycho-social history including relevant genetic information . . . . .                      | page2, line12                                                       |
|                                     | 5d   | Relevant past interventions with outcomes . . . . .                                                              | page2, line12-14                                                    |
| <b>Clinical Findings</b>            | 6    | Describe significant physical examination (PE) and important clinical findings. . . . .                          | page2, line19-29                                                    |
| <b>Timeline</b>                     | 7    | Historical and current information from this episode of care organized as a timeline . . . . .                   | page9, table1                                                       |
| <b>Diagnostic<br/>Assessment</b>    | 8a   | Diagnostic testing (such as PE, laboratory testing, imaging, surveys). . . . .                                   | page3, line4-20                                                     |
|                                     | 8b   | Diagnostic challenges (such as access to testing, financial, or cultural) . . . . .                              | no applicable                                                       |
|                                     | 8c   | Diagnosis (including other diagnoses considered). . . . .                                                        | page3, line21-22                                                    |
|                                     | 8d   | Prognosis (such as staging in oncology)where applicable . . . . .                                                | no applicable                                                       |
| <b>Therapeutic<br/>Intervention</b> | 9a   | Types of therapeutic intervention (such as pharmacologic,surgical,preventive,self-care). . . . .                 | page3, line23                                                       |
|                                     | 9b   | Administration of therapeutic intervention (such as dosage,strength,duration). . . . .                           | page3, line22-25                                                    |
|                                     | 9c   | Changes in therapeutic intervention (with rationale). . . . .                                                    | page3, line34-35                                                    |
| <b>Follow-up and<br/>Outcomes</b>   | 10a  | Clinician and patient-assessed outcomes (if available). . . . .                                                  | page3, line25-27                                                    |
|                                     | 10b  | Important follow-up diagnostic and other test results . . . . .                                                  | page3, line27-33                                                    |
|                                     | 10c  | Intervention adherence and tolerability (How was this assessed?). . . . .                                        | page3, line37-38                                                    |
|                                     | 10d  | Adverse and unanticipated events . . . . .                                                                       | no applicable                                                       |
| <b>Discussion</b>                   | 11a  | A scientific discussion of the strengths AND limitations associated with this case report . . . . .              | page5, line21-26                                                    |
|                                     | 11b  | Discussion of the relevant medical literature <b>with references</b> . . . . .                                   | page3, line40-page4, line27                                         |
|                                     | 11c  | The scientific rationale for any conclusions (including assessment of possible causes). . . . .                  | page4, line28-page5, line13                                         |
|                                     | 11d  | The primary "take-away" lessons of this case report (without references)in a one paragraph conclusion . . . . .  | page5, line27-34                                                    |
| <b>Patient Perspective</b>          | 12   | The patient should share their perspective in one to two paragraphs on the treatment(s)they received . . . . .   | page3, line37-38                                                    |
| <b>Informed Consent</b>             | 13   | Did the patient give informed consent? Please provide if requested . . . . .                                     | Yes <input checked="" type="checkbox"/> No <input type="checkbox"/> |
